# Supplementary material for: An Interactome Map of Maize (Zea mays L.)
Source: Research Square preprint supplement (doi:10.21203/rs.3.rs-88694/v2), 2020-12-01
Supplement: Supplementary file 1 [file 51438e350bce629d18c236ad.xlsx]

## Sheet: Sheet1
Supplementary Table 2. Number of interactions at different layers of genetic information flow for different confidence levels.
	3D	Transcriptome			Slim-transcriptome			Translatome			Proteome			Integrative omics			Slim Integrative omics			Transcriptome without siRNAs			Integrative omics without siRNAs
Confidence	-	High	Middle	Low	High	Middle	Low	High	Middle	Low	High	Middle	Low	High	Middle	Low	High	Middle	Low	High	Middle	Low	High	Middle	Low
Node numbers	13142	178025	179157	179255	23542	24293	24375	23646	24313	24341	18305	24106	25155	182995	185401	185868	28878	30580	30988	33107	34994	35207	38556	41316	41834
Edge numbers	14788	2944080	6097526	9328238	121761	271520	430303	68972	187649	309758	87775	301210	367868	3111490	6585263	9989038	290539	764689	101613	150873	341966	545956	320015	836470	1220001
Average distance	27.09	6.316	5.1	4.566	5.59	4.299	3.846	7.77	5.218	4.51	3.953	3.018	2.906	6.105	4.937	4.451	3.812	3.002	2.855	5.786	4.398	3.896	4.226	3.329	3.107
Transitivity	0.254	0.321	0.33	0.336	0.123	0.136	0.146	0.12	0.147	0.163	0.006	0.02	0.024	0.296	0.263	0.284	0.043	0.037	0.05	0.105	0.108	0.115	0.042	0.036	0.048
Total modules	4051	17836	9451	5553	4953	3711	2626	6994	7140	6504	4611	2780	2193	25675	18221	13951	2110	1779	1516	7044	5842	4485	9054	10499	10744
Modules(>=5 genes)	689	5998	2985	1733	1263	971	645	1485	1341	1090	1285	815	680	11490	7351	5203	7299	8650	8965	1816	1335	912	2829	2452	2139
