# Supplementary material for: An Interactome Map of Maize (Zea mays L.)
Source: Research Square preprint supplement (doi:10.21203/rs.3.rs-88694/v2), 2020-12-01
Supplement: Supplementary file 2 [file 9ad368bba1beb4d465979d2d.xlsx]

## Sheet: Sheet1
Supplementary Table 7. Well-known meristem development related genes in maize.
##Meristem developmental related pathway
Gene ID	Gene symbol
Zm00001d033859	KN1
Zm00001d042989	BA1
Zm00001d045427	BAF1
Zm00001d008749	BIF1
Zm00001d037691	BIF4
Zm00001d031068	BIF2
Zm00001d044069	SPI1
Zm00001d008700	VT2
Zm00001d022488	BD1
Zm00001d027886	CT2
Zm00001d051012	FEA2
Zm00001d040130	FEA3
Zm00001d037317	FEA4
Zm00001d014793	TD1
Zm00001d042268	ZMCRN
Zm00001d033422	ZMGB1
Zm00001d030916	XLG1
Zm00001d054088	XLG3A
Zm00001d035926	XLG3B
Zm00001d001948	ZMWUS1
Zm00001d026537	ZMWUS2
Zm00001d036602	KNR6
Zm00001d038063	AGAP
Zm00001d033905	GIF1
Zm00001d031451	UB2
Zm00001d052890	UB3
Zm00001d030656	RTE1
Zm00001d041590	RTE2
Zm00001d032461	TLS1
Zm00001d027412	FZT1
Zm00001d042445	TE1
Zm00001d020430	RA1
Zm00001d039694	RA2
Zm00001d022193	RA3
Zm00001d024523	REL2
Zm00001d052227	TPP4
