# Supplementary material for: An Interactome Map of Maize (Zea mays L.)
Source: Research Square preprint supplement (doi:10.21203/rs.3.rs-88694/v2), 2020-12-01
Supplement: Supplementary file 3 [file f0a35096061fbe96e08f9188.xlsx]

## Sheet: Sheet1
Supplementary Table 3. Eight distinct tissues for the construction of 8 bait and 8 prey cDNA libraries were applied for interaction screens of library vs. library mating using the RLL-Y2H system.
Sample	PPIs group
Primary Root (6 DAS)	Group 1
Primary Root (V1)
First Leaf - L(V3)	Group 2
Topmost Leaf - L(V3)
Tip of 2 Stage leaf - L(V5)
Base of 2 Stage leaf - L (V5)
Husk leaf
Ear leaf
SAM (V3)	Group 4
Ear (2 mm)	Group 5
Tassel (2 mm)
Ear (5 mm)
Silk	Group 6
Ear (3 cm)
Anther	Group 7
Tassel (2 cm)
Endosperm (15 DAP)	Group 3
Endosperm (25 DAP)
Embryo (15 DAP)	Group 8
Embryo (25 DAP)
Note: DAS, days after sowing. SAM, shoot apical meristem. DAP, days after pollination. L indicates material taken on the sun rises 3h (9:00 am), L is in contrast to N, which indicates material taken on the sun sets 3h (10:00 pm, totally dark).
